# Supplementary material for: Covered stent implantation for calcified nodule to physically hinder its protrusion causing restenosis: a case report
Source: PubMed Central journal article supplement — Cardiovasc Diagn Ther. 2024 Oct 22;14(5):974–81. doi: 10.21037/cdt-24-216 (PMC11538835; doi:10.21037/cdt-24-216), 2024-10-22
Supplement: cdt-14-05-974-rc.pdf [file cdt-14-05-974-rc.pdf]

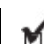

| Topic                            | Item No | Checklist item description                                                                                                                                                     | Reported on Page Number/Line Number | Reported on Section/Paragraph |
|----------------------------------|---------|--------------------------------------------------------------------------------------------------------------------------------------------------------------------------------|-------------------------------------|-------------------------------|
| Title                            | 1       | The diagnosis or intervention of primary focus followed by the words "case report"                                                                                             | Page 1, lines 3-4                   | Title page                    |
| Key Words                        | 2       | 2 to 5 key words that identify diagnoses or interventions in this case report, including "case report"                                                                         | Page 4, lines 67-68                 | Title page                    |
| Abstract<br>(Structured summary) | 3a      | Background: state what is known and unknown; why the case report is unique and what it adds to existing literature.                                                            | Page 3, lines 33-44                 | Abstract                      |
|                                  | 3b      | Case Description: describe the patient's demographic details, main symptoms, history, important clinical findings, the main diagnosis, interventions, outcomes and follow-ups. | Page 3,4 lines 45-63                | Abstract                      |
|                                  | 3c      | Conclusions: summarize the main take-away lesson, clinical impact and potential implications.                                                                                  | Page 4, lines 64-66                 | Abstract                      |
| Introduction                     | 4       | One or two paragraphs summarizing why this case is unique ( <b>may include references</b> )                                                                                    | Page 6, lines 108-112               | Background                    |
| Patient Information              | 5a      | De-identified patient specific information                                                                                                                                     | Yes                                 | Throughout the manuscript     |
|                                  | 5b      | Primary concerns and symptoms of the patient                                                                                                                                   | Page 7, line 116                    | Case Presentation             |
|                                  | 5c      | Medical, family, and psycho-social history including relevant genetic information                                                                                              | Page 8, lines 118-119               | Case Presentation             |
|                                  | 5d      | Relevant past interventions with outcomes                                                                                                                                      | None                                |                               |
| Clinical Findings                | 6       | Describe significant physical examination (PE) and important clinical findings                                                                                                 | Page 8, lines 119-126               | Case Presentation             |
| Timeline                         | 7       | Historical and current information from this episode of care organized as a timeline                                                                                           | Page 10, line 171 and Figure 3      | Case Presentation             |
| Diagnostic Assessment            | 8a      | Diagnostic testing (such as PE, laboratory testing, imaging, surveys).                                                                                                         | Page 8, lines 126-132               | Case Presentation             |
|                                  | 8b      | Diagnostic challenges (such as access to testing, financial, or cultural)                                                                                                      | Page 8, lines 132-135               | Case Presentation             |
|                                  | 8c      | Diagnosis (including other diagnoses considered)                                                                                                                               | Page 8, lines 132-135               | Case Presentation             |
|                                  | 8d      | Prognosis (such as staging in oncology) where applicable                                                                                                                       | None                                |                               |
| Therapeutic Intervention         | 9a      | Types of therapeutic intervention (such as pharmacologic, surgical, preventive, self-care)                                                                                     | Page 8 lines 131-132                | Case Presentation             |
|                                  | 9b      | Administration of therapeutic intervention (such as dosage, strength, duration)                                                                                                | Page 8,9 lines 135-146              | Case Presentation             |
|                                  | 9c      | Changes in therapeutic intervention (with rationale)                                                                                                                           | Page 9,10 lines 152-158             | Case Presentation             |

|                        |     |                                                                                                        |                                         |                                    |
|------------------------|-----|--------------------------------------------------------------------------------------------------------|-----------------------------------------|------------------------------------|
| Follow-up and Outcomes | 10a | Clinician and patient-assessed outcomes (if available)                                                 | Page 10, line 169-171                   | Case Presentation                  |
|                        | 10b | Important follow-up diagnostic and other test results                                                  | Page 10, lines 164-169                  | Case Presentation                  |
|                        | 10c | Intervention adherence and tolerability (How was this assessed?)                                       | None                                    |                                    |
|                        | 10d | Adverse and unanticipated events                                                                       | Page 10, line 169-171                   | Case Presentation                  |
| Discussion             | 11a | A scientific discussion of the strengths AND limitations associated with this case report              | Page 11,12 lines 192-208                | Strength and limitations           |
|                        | 11b | Discussion of the relevant medical literature <b>with references</b>                                   | Page 12 lines 209-214                   | Comparison with similar researches |
|                        | 11c | The scientific rationale for any conclusions (including assessment of possible causes)                 | Page 13, lines 215-221                  | Explanations of findings           |
|                        | 11d | The primary “take-away” lessons of this case report (without references) in a one paragraph conclusion | Page 11-12, lines 167-176               | Conclusion                         |
| Patient Perspective    | 12  | The patient should share their perspective in one to two paragraphs on the treatment(s) they received  | none                                    |                                    |
| Informed Consent       | 13  | Did the patient give informed consent? Please provide if requested                                     | Yes <input checked="" type="checkbox"/> | <input type="checkbox"/>           |

Article Information: <https://dx.doi.org/10.21037/cdt-24-216>

\*As the checklist was provided upon initial submission, the page number/line number reported may be changed due to copyediting and may not be referable in the published version. In this case, the section/paragraph may be used as an alternative reference.
